# Supplementary material for: Antiproliferative Activity of Buddleja saligna (Willd.) against Melanoma and In Vivo Modulation of Angiogenesis
Source: MDPI journal article supplement (doi:10.3390/ph15121497), 2022-11-30
Supplement: s1 [file s1]

---

# Supplementary Information for

## Antiproliferative activity of *Buddleja saligna* (Willd.) against melanoma and *in vivo* modulation of angiogenesis

Danielle Twilley<sup>1</sup>, Velaphi C. Thipe<sup>2</sup>, Navneet Kishore<sup>1</sup>, Pierce Bloebaum<sup>3</sup>, Catarina Roma-Rodrigues<sup>4</sup>, Pedro V. Baptista<sup>4</sup>, Alexandra R. Fernandes<sup>4</sup>, Mamoalosi A. Selepe<sup>5</sup>, Lenka Langhansova<sup>6</sup>, Kattesh Katti<sup>1,2,7,8\*</sup>, Namrita Lall<sup>1,9,10,11\*</sup>

This PDF file includes:

Figures S1 to S9

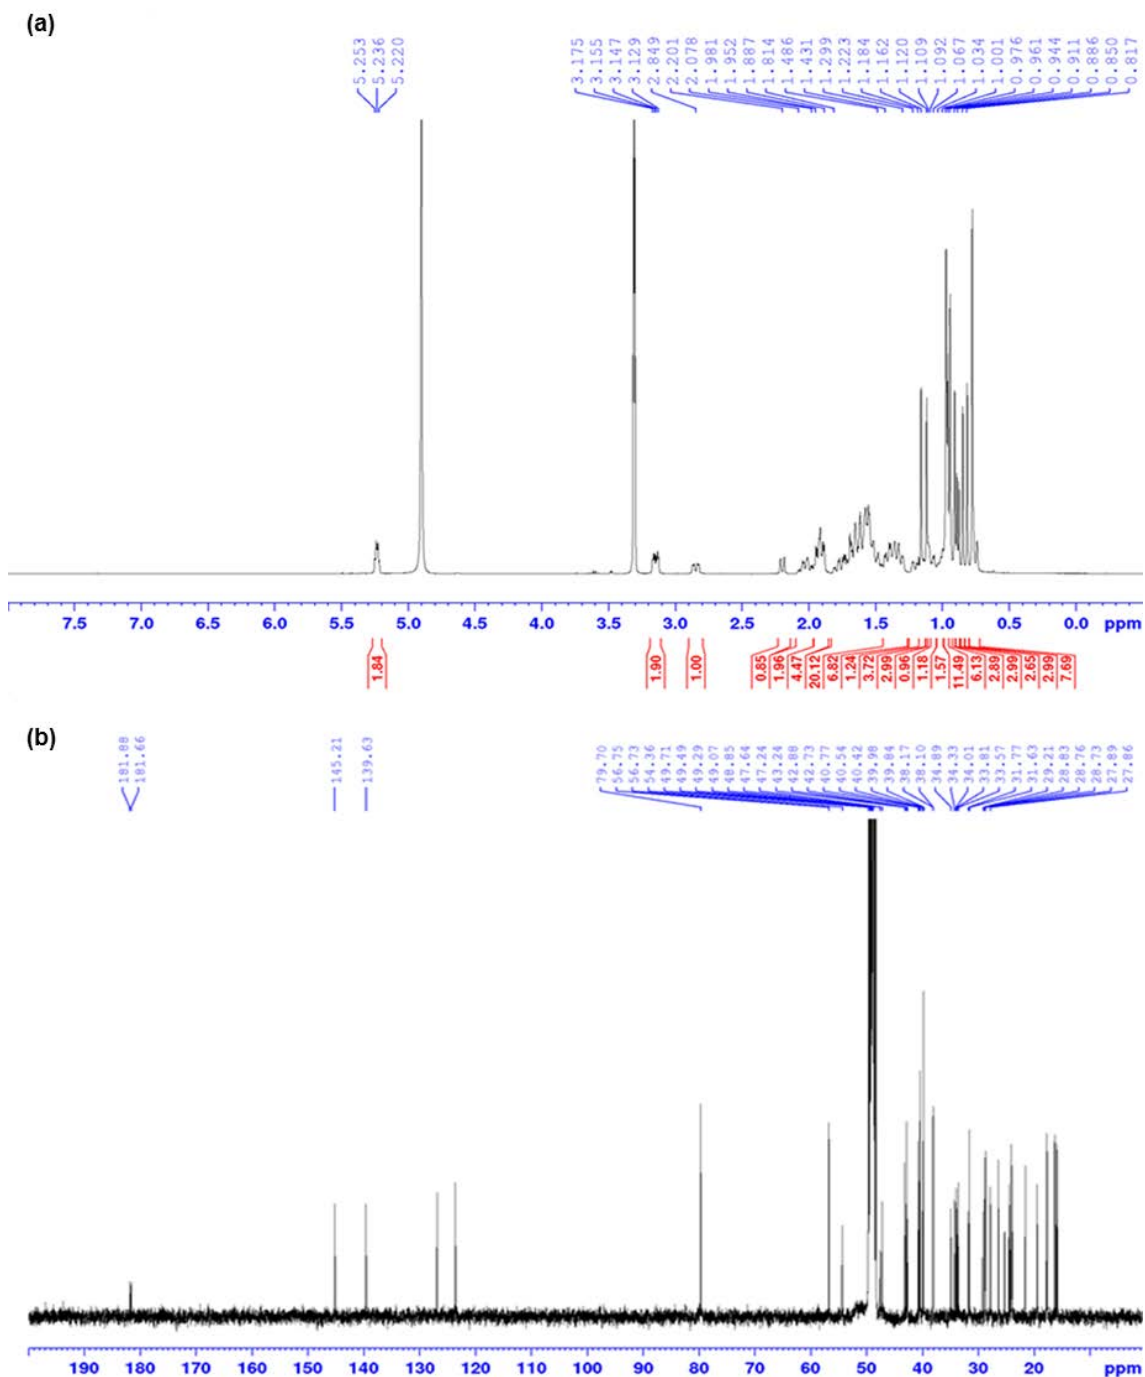

**Figure S1.** Representative (a)  $^1\text{H}$ -NMR (Methanol- $\text{d}_4$ , 400 MHz) and (b)  $^{13}\text{C}$ -NMR (Methanol- $\text{d}_4$ , 100 MHz) spectra of DT-BS-01

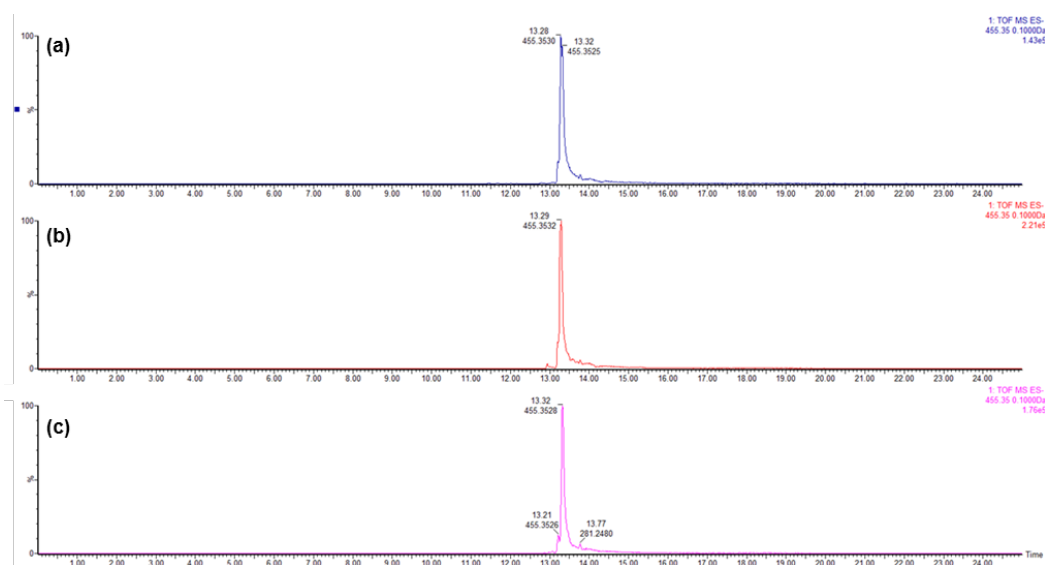

**Figure S2.** Extracted-ion chromatogram (XIC) of  $m/z$  455.35 in negative ionization mode of LC-MS analysis of (a) DT-BS-01; (b) Oleanolic acid and (c) Ursolic acid

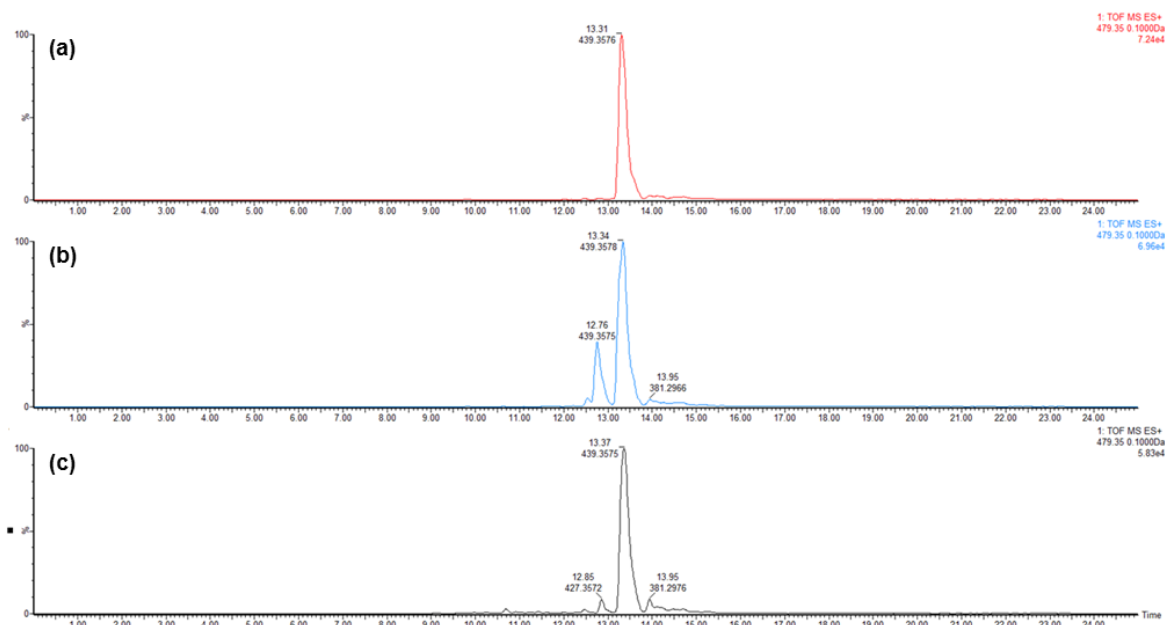

**Figure S3.** Extracted-ion chromatogram (XIC) of  $m/z$  479.35 in positive ionization mode of LC-MS analysis of (a) DT-BS-01 (b) Oleanolic acid and (c) Ursolic acid

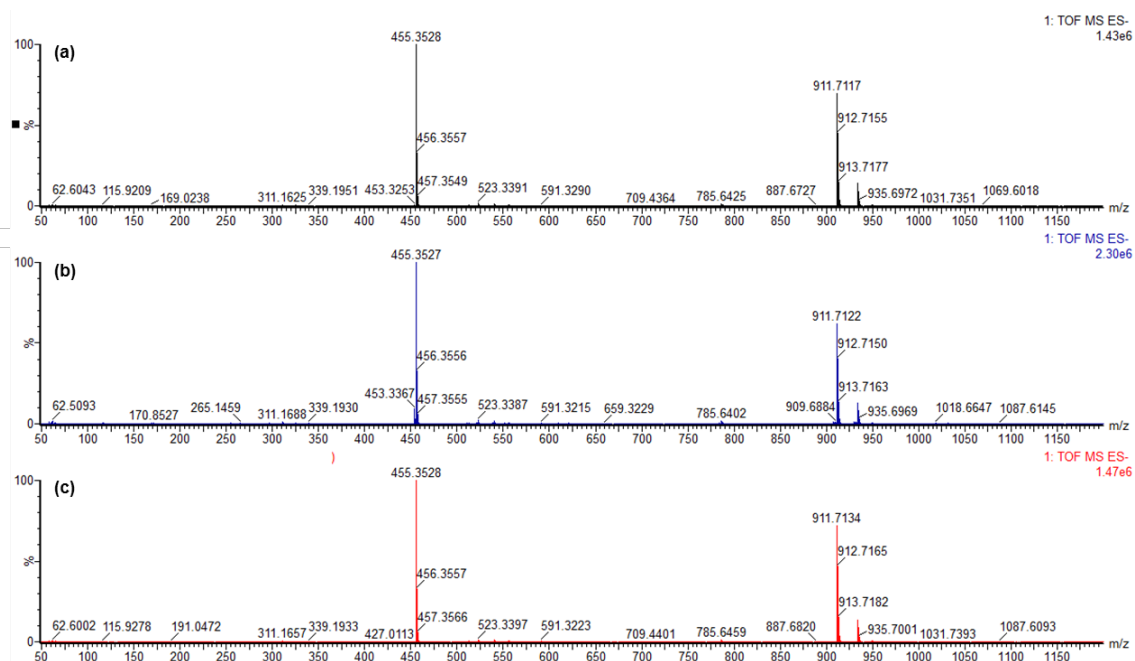

**Figure S4.** Negative ionization mode mass spectra of (a) DT-BS-01; (b) Oleanolic acid and (c) Ursolic acid

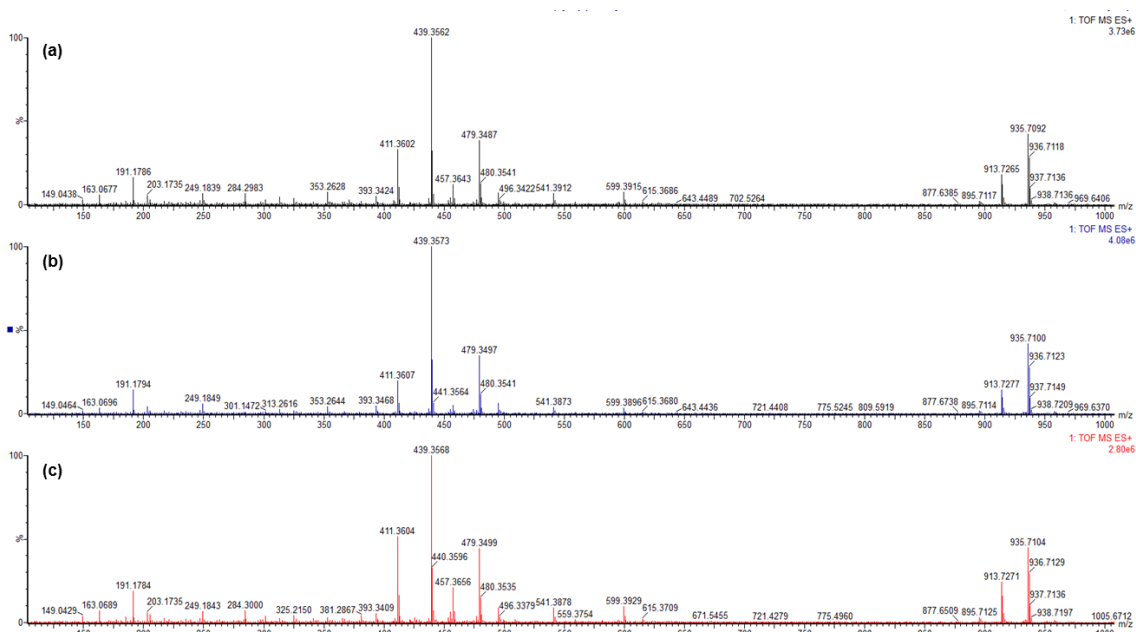

**Figure S5.** Positive ionization mode mass spectra of (a) DT-BS-01; (b) Oleanolic acid and (c) Ursolic acid

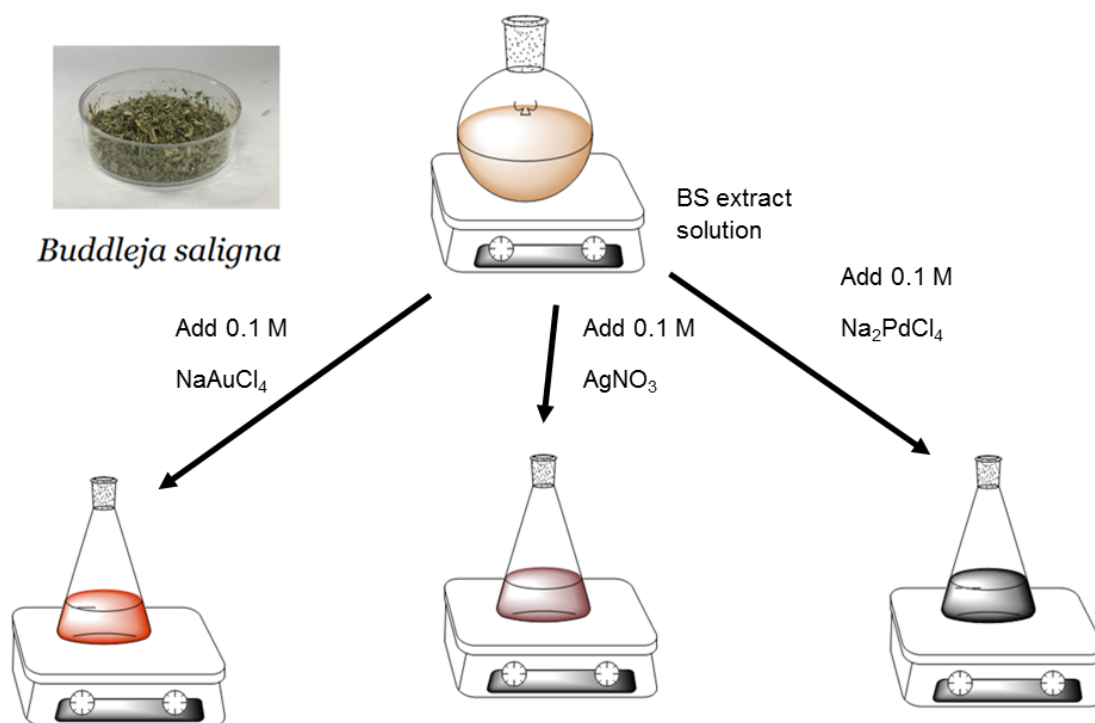

**Figure S6.** Synthesis process of nanoparticles using *Buddleja saligna*

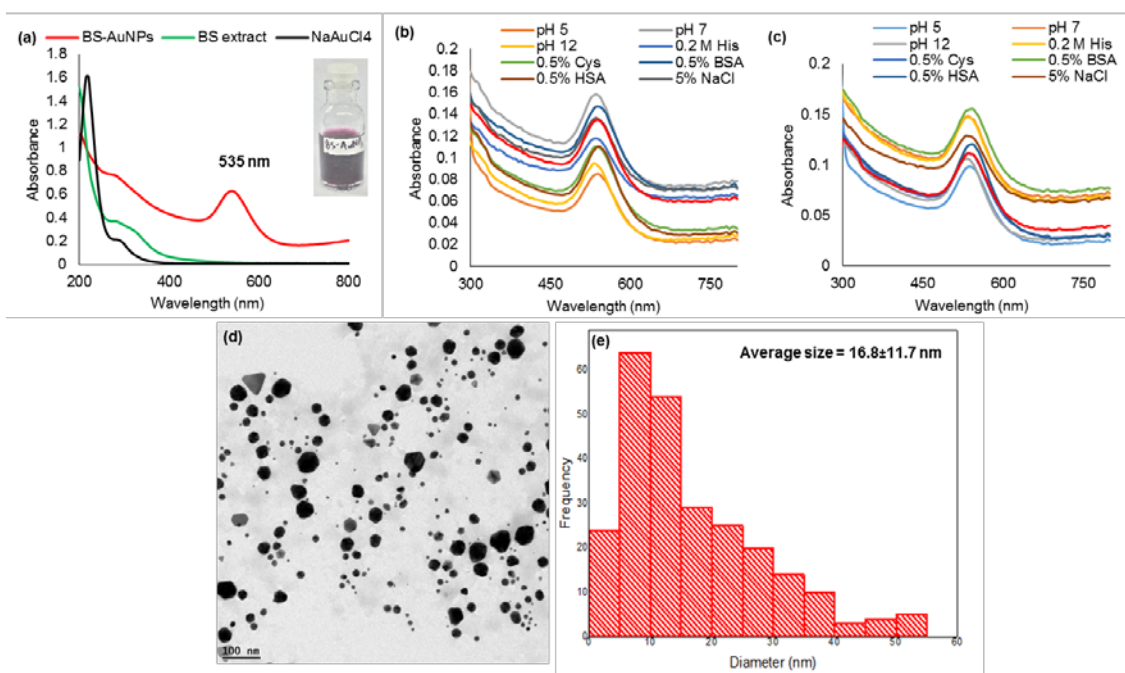

**Figure S7.** Characterization of BS-AuNPs. (a) UV-Vis absorption spectra; (b) *In vitro* stability in buffer solutions after 24 h; (c) *In vitro* stability in buffer solutions after 48 h; (d) Transmission electron micrograph; (e) Particle size distribution



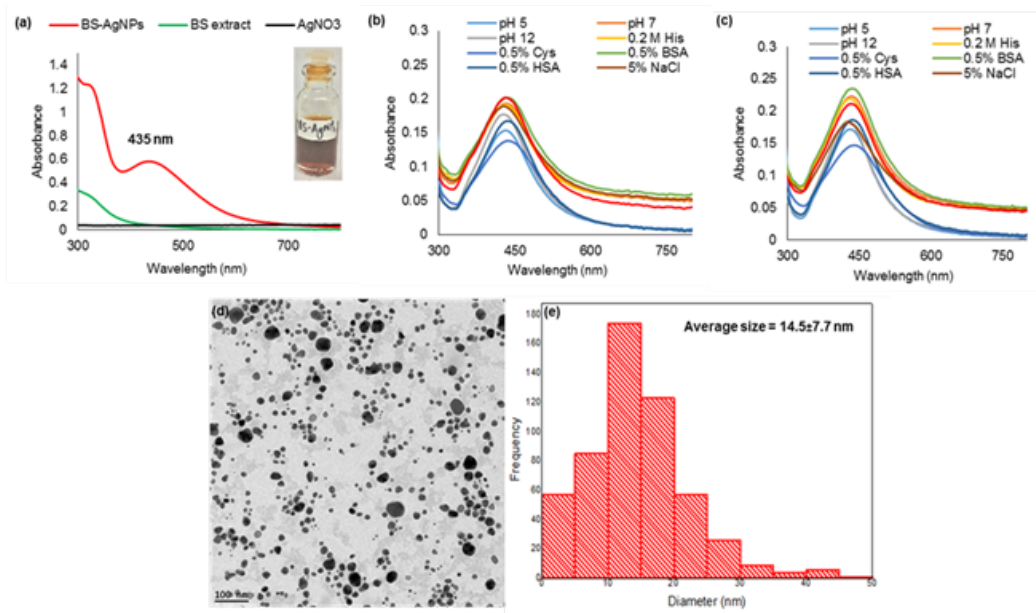

**Figure S8.** Characterization of BS-AgNPs. (a) UV-Vis absorption spectra. (b) *In vitro* stability in buffer solutions after 24 h. (c) *In vitro* stability in buffer solutions after 48 h. (d) Transmission electron micrograph. (e) Particle size distribution

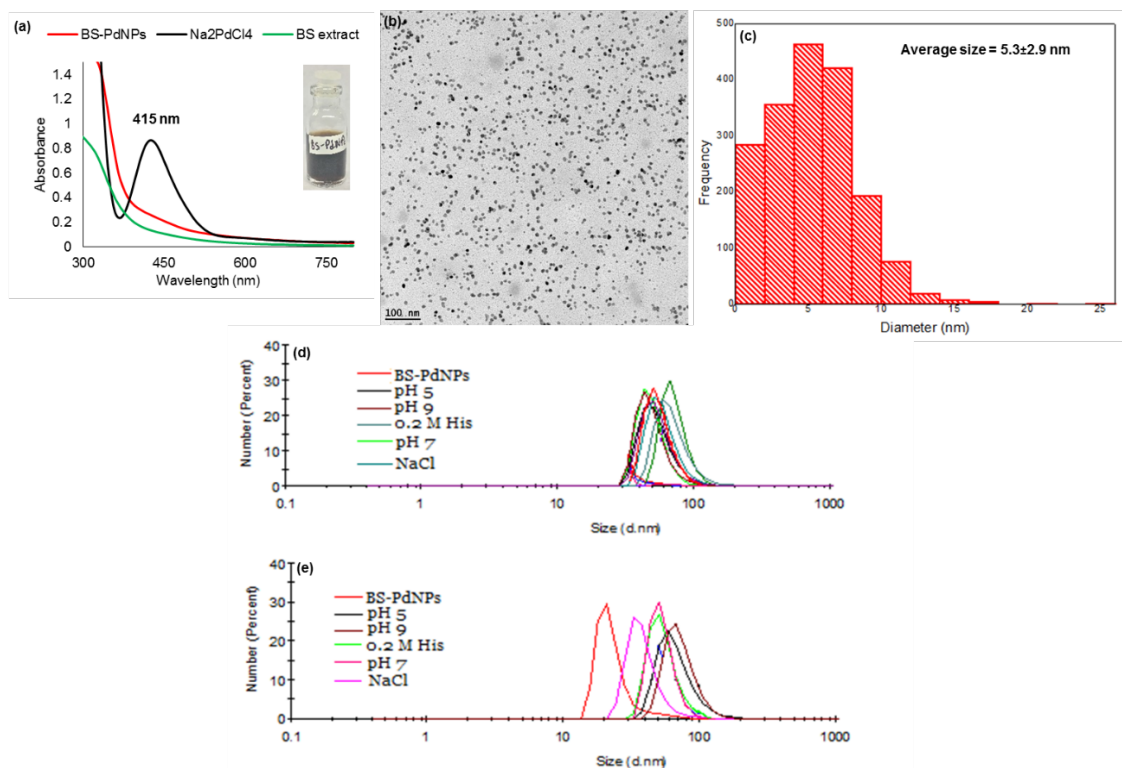

**Figure S9.** Characterization of BS-PdNPs. (a) UV-Vis absorption spectra; (b) Transmission electron micrograph; (c) Particle size distribution; (d) *In vitro* stability in buffer solutions after 24 h; (e) *In vitro* stability in buffer solutions after 48 h
